Articles of interest in other COB journals

From *Journal of Cell Science*

**NDST1-dependent heparan sulfate regulates BMP signaling and internalization in lung development**

Zhonghua Hu, Chaochen Wang, Ying Xiao, Nengyin Sheng, Yibin Chen, Ye Xu, Liang Zhang, Wei Mo, Naihe Jing and Gengxi Hu

Hu, Z. et al. 2009. *J. Cell Sci.* doi: 10.1242/jcs.034736

**PP2A regulates BMP signalling by interacting with BMP receptor complexes and by dephosphorylating both the C-terminus and the linker region of Smad1**

Luiza Bengtsson, Raphaela Schwappacher, Martin Roth, Jan H. Boergemann, Sylke Hassel and Petra Knaus

Bengtsson, L. et al. 2009. *J. Cell Sci.* doi: 10.1242/jcs.039552
